# Supplementary material for: Home Physical Exercise Protocol for Older Adults, Applied Remotely During the COVID-19 Pandemic: Protocol for Randomized and Controlled Trial
Source: Front Psychol. 2022 Feb 4;13:828495. doi: 10.3389/fpsyg.2022.828495 (PMC8855123; doi:10.3389/fpsyg.2022.828495)
Supplement: Supplementary file 1 [file Table_1.xlsx]

## Sheet: Plan1
Week 1 - Adaptation
3 workouts per week
Exercises	Sets	Repetitions	Rest time	Speed in conccentrics and eccentrics phase	Load	Description of Exercises
Warm up included rotation of the articulations of the upper and lower body (neck, shoulder, hip, knee and ankle) 10 min
Sit to stand exercise or chair squats	1	10	0	≈3 seconds	Body Weight	With a chair against the wall, sit and stand up from it with your hands on the shoulders.
Horizontal bench press	1	10	0	≈3 seconds	Water Bottles 500ml	Lying on a blanket or a mat on the floor with the flexed knees and feet flat on the floor, flex and extend your elbows aligned with the pectoral while holding the water bottles.
Single-arm bent over row	1	10	0	≈3 seconds	Water Bottle 500ml	With the trunk bent over and one hand supported on a chair ou sofa, extend the and flex your elbow until maximal possible shoulder extension, always keeping the arm close to the trunk, while holding a waterbottle on the hand of the arm executing the movement, after finishing with one arm repeat with the other.
Standing hamstring curl	1	10	0	≈3 seconds	Body Weight	Standing with both hands supported on a chair, flex and extend the knees of one leg, after finishing with one leg repeat with the other.
Knee extension	1	10	0	≈3 seconds	Body Weight	Seating on a chair without arms of lateral support, lean your back on the backrest and hold firmly the sides of the chair to keep your trunk steady, extend and flex the knee of one leg, after finishing with one leg repeat with the other.
Biceps curl	1	10	0	≈3 seconds	Water Bottles 500ml	Standing with two water bottles on your hands in supine position, arms besides the trunk and semiflexed knees, flex and extend the elbows until maximal extension.
Lateral raise	1	10	0	≈3 seconds	Water Bottles 500ml	Standing with two water bottles on your hands, arms beside the trunk and semiflexed knees, elevate your hands to shoulders line and lower them until your arms touch your trunk.
Standing calf raise	1	10	0	≈3 seconds	Body Weight	Standing with both hands supported on a chair, raise your calfs of the two feet and lower them.
Abdominal crunch	1	10	0	≈3 seconds	Body Weight	Lying on a blanket or mat on the floor, flexed knees and feet flat on the fllor, try to observe a fixed point in front of you without flexing your cervical and compress the abdominal region, without taking your lower back off the mat or blanket.
Flexibility/Stretching Cool Down - (The relaxing period included breathing and stretching exercises) - 10 min						Exercises (knee extension and seated trunk flexion, seated on a chair trunk flexion, wall supported arm aduction and abduction, chair or wall supported knee flexion, front and back shoulder circumduction) always executed with supports like wall, floor, chairs ans sofas. Always breathing on the same rhythm in a calm and deep way, inhealing and exhealing the air as much as you can.
Week 2
3 workout per week
Exercises	Sets	Repetitions	Rest time	Speed in conccentrics and eccentrics phase	Load	Description of Exercises
Warm up included rotation of the articulations of the upper and lower body (neck, shoulder, hip, knee and ankle) 10 min
Single-arm bent over row	2	10	0	≈3 seconds	Water Bottle 500ml	With the trunk bent over and one hand supported on a chair ou sofa, extend the and flex your elbow until maximal possible shoulder extension, always keeping the arm close to the trunk, while holding a waterbottle on the hand of the arm executing the movement, after finishing with one arm repeat with the other.
Standing hamstring curl	2	10	0	≈3 seconds	Body Weight	Standing with both hands supported on a chair, flex and extend the knees of one leg, after finishing with one leg repeat with the other.
Horizontal bench press	2	10	0	≈3 seconds	Water Bottles 500ml	Lying on a blanket or a mat on the floor with the flexed knees and feet flat on the floor, flex and extend your elbows aligned with the pectoral while holding the water bottles.
Sit to stand exercise or chair squats	2	10	0	≈3 seconds	Body Weight	With a chair against the wall, sit and stand up from it with your hands on the shoulders.
Biceps curl	2	10	0	≈3 seconds	Water Bottles 500ml	Standing with two water bottles on your hands in supine position, arms besides the trunk and semiflexed knees, flex and extend the elbows until maximal extension.
Knee extension	2	10	0	≈3 seconds	Body Weight	Seating on a chair without arms of lateral support, lean your back on the backrest and hold firmly the sides of the chair to keep your trunk steady, extend and flex the knee of one leg, after finishing with one leg repeat with the other.
Abdominal crunch	2	10	0	≈3 seconds	Body Weight	Lying on a blanket or mat on the floor, flexed knees and feet flat on the fllor, try to observe a fixed point in front of you without flexing your cervical and compress the abdominal region, without taking your lower back off the mat or blanket.
Lateral raise	2	10	0	≈3 seconds	Water Bottles 500ml	Standing with two water bottles on your hands, arms beside the trunk and semiflexed knees, elevate your hands to shoulders line and lower them until your arms touch your trunk.
Standing calf raise	2	10	0	≈3 seconds	Body Weight	Standing with both hands supported on a chair, raise your calfs of the two feet and lower them.
Flexibility/Stretching Cool Down - (The relaxing period included breathing and stretching exercises) - 10 min						Exercises (knee extension and seated trunk flexion, seated on a chair trunk flexion, wall supported arm aduction and abduction, chair or wall supported knee flexion, front and back shoulder circumduction) always executed with supports like wall, floor, chairs ans sofas. Always breathing on the same rhythm in a calm and deep way, inhealing and exhealing the air as much as you can.
Week 3
3 workouts per week
Exercises	Sets	Repetitions	Rest time	Speed in conccentrics and eccentrics phase	Load	Description of Exercises
Warm up included rotation of the articulations of the upper and lower body (neck, shoulder, hip, knee and ankle) 10 min
Sit to stand exercise or chair squats	2	15	0	≈3 seconds	Body Weight	With a chair against the wall, sit and stand up from it with your hands on the shoulders.
Horizontal bench press	2	15	0	≈3 seconds	Water Bottles 500ml	Lying on a blanket or a mat on the floor with the flexed knees and feet flat on the floor, flex and extend your elbows aligned with the pectoral while holding the water bottles.
Single-arm bent over row	2	15	0	≈3 seconds	Water Bottle 500ml	With the trunk bent over and one hand supported on a chair ou sofa, extend the and flex your elbow until maximal possible shoulder extension, always keeping the arm close to the trunk, while holding a waterbottle on the hand of the arm executing the movement, after finishing with one arm repeat with the other.
Standing hamstring curl	2	15	0	≈3 seconds	Body Weight	Standing with both hands supported on a chair, flex and extend the knees of one leg, after finishing with one leg repeat with the other.
Knee extension	2	15	0	≈3 seconds	Body Weight	Seating on a chair without arms of lateral support, lean your back on the backrest and hold firmly the sides of the chair to keep your trunk steady, extend and flex the knee of one leg, after finishing with one leg repeat with the other.
Biceps curl	2	15	0	≈3 seconds	Water Bottles 500ml	Standing with two water bottles on your hands in supine position, arms besides the trunk and semiflexed knees, flex and extend the elbows until maximal extension.
Lateral raise	2	15	0	≈3 seconds	Water Bottles 500ml	Standing with two water bottles on your hands, arms beside the trunk and semiflexed knees, elevate your hands to shoulders line and lower them until your arms touch your trunk.
Standing calf raise	2	15	0	≈3 seconds	Body Weight	Standing with both hands supported on a chair, raise your calfs of the two feet and lower them.
Abdominal crunch	2	15	0	≈3 seconds	Body Weight	Lying on a blanket or mat on the floor, flexed knees and feet flat on the fllor, try to observe a fixed point in front of you without flexing your cervical and compress the abdominal region, without taking your lower back off the mat or blanket.
Flexibility/Stretching Cool Down - (The relaxing period included breathing and stretching exercises) - 10 min						Exercises (knee extension and seated trunk flexion, seated on a chair trunk flexion, wall supported arm aduction and abduction, chair or wall supported knee flexion, front and back shoulder circumduction) always executed with supports like wall, floor, chairs ans sofas. Always breathing on the same rhythm in a calm and deep way, inhealing and exhealing the air as much as you can.
Week 4
3 workouts per week
Exercises	Sets	Repetitions	Rest time	Speed in conccentrics and eccentrics phase	Load	Description of Exercises
Warm up included rotation of the articulations of the upper and lower body (neck, shoulder, hip, knee and ankle) 10 min
Single-arm bent over row	2	15	0	≈3 seconds	Water Bottle 500ml	With the trunk bent over and one hand supported on a chair ou sofa, extend the and flex your elbow until maximal possible shoulder extension, always keeping the arm close to the trunk, while holding a waterbottle on the hand of the arm executing the movement, after finishing with one arm repeat with the other.
Standing hamstring curl	2	15	0	≈3 seconds	Body Weight	Standing with both hands supported on a chair, flex and extend the knees of one leg, after finishing with one leg repeat with the other.
Horizontal bench press	2	15	0	≈3 seconds	Water Bottles 500ml	Lying on a blanket or a mat on the floor with the flexed knees and feet flat on the floor, flex and extend your elbows aligned with the pectoral while holding the water bottles.
Sit to stand exercise or chair squats	2	15	0	≈3 seconds	Body Weight	With a chair against the wall, sit and stand up from it with your hands on the shoulders.
Biceps curl	2	15	0	≈3 seconds	Water Bottles 500ml	Standing with two water bottles on your hands in supine position, arms besides the trunk and semiflexed knees, flex and extend the elbows until maximal extension.
Knee extension	2	15	0	≈3 seconds	Body Weight	Seating on a chair without arms of lateral support, lean your back on the backrest and hold firmly the sides of the chair to keep your trunk steady, extend and flex the knee of one leg, after finishing with one leg repeat with the other.
Abdominal crunch	2	15	0	≈3 seconds	Body Weight	Lying on a blanket or mat on the floor, flexed knees and feet flat on the fllor, try to observe a fixed point in front of you without flexing your cervical and compress the abdominal region, without taking your lower back off the mat or blanket.
Lateral raise	2	15	0	≈3 seconds	Water Bottles 500ml	Standing with two water bottles on your hands, arms beside the trunk and semiflexed knees, elevate your hands to shoulders line and lower them until your arms touch your trunk.
Standing calf raise	2	15	0	≈3 seconds	Body Weight	Standing with both hands supported on a chair, raise your calfs of the two feet and lower them.
Flexibility/Stretching Cool Down - (The relaxing period included breathing and stretching exercises) - 10 min						Exercises (knee extension and seated trunk flexion, seated on a chair trunk flexion, wall supported arm aduction and abduction, chair or wall supported knee flexion, front and back shoulder circumduction) always executed with supports like wall, floor, chairs ans sofas. Always breathing on the same rhythm in a calm and deep way, inhealing and exhealing the air as much as you can.
